# Supplementary material
Source: PubMed Central journal article supplement (PMC6372064)
Supplement: NIHMS81540-supplement-Supplementary_Note.pdf [file NIHMS81540-supplement-Supplementary_Note.pdf]

## SUPPLEMENTARY NOTE

The CamCAP Study Group is composed of the following members:

| Name                      | Affiliation                                                                                                                             | 2 <sup>nd</sup> Affiliation                                                       | 3 <sup>rd</sup> Affiliation                                                         |
|---------------------------|-----------------------------------------------------------------------------------------------------------------------------------------|-----------------------------------------------------------------------------------|-------------------------------------------------------------------------------------|
| Adam Nelson               | Cancer Research UK<br>Cambridge Institute,<br>University of Cambridge,<br>Cambridge CB2 0RE, UK                                         |                                                                                   |                                                                                     |
| Ajoeb Baridi              | Addenbrooke's Hospital,<br>University of Cambridge,<br>Cambridge, CB2 0QQ, UK                                                           |                                                                                   |                                                                                     |
| Alastair Lamb             | Cancer Research UK<br>Cambridge Institute,<br>University of Cambridge,<br>Cambridge CB2 0RE, UK                                         | Department of<br>Urology,<br>Addenbrooke's<br>Hospital, Cambridge,<br>CB2 0QQ, UK | Academic Urology<br>Group, University<br>of Cambridge,<br>Cambridge, CB2<br>0QQ, UK |
| Andrew Doble              | Addenbrooke's Hospital,<br>University of Cambridge,<br>Cambridge, CB2 0QQ, UK                                                           |                                                                                   |                                                                                     |
| Andrew Lynch              | Statistics and<br>Computational Biology<br>Laboratory, Cancer<br>Research UK Cambridge<br>Research Institute,<br>Cambridge, CB2 0RE, UK |                                                                                   |                                                                                     |
| Anne George               | Addenbrooke's Hospital,<br>University of Cambridge,<br>Cambridge, CB2 0QQ, UK                                                           |                                                                                   |                                                                                     |
| Anne Y. Warren            | Department of<br>Histopathology,<br>Cambridge University<br>Hospitals NHS<br>Foundation Trust,<br>Cambridge, CB2 0QQ, UK                |                                                                                   |                                                                                     |
| Antonio Ramos-<br>Montoya | Addenbrooke's Hospital,<br>University of Cambridge,<br>Cambridge, CB2 0QQ, UK                                                           |                                                                                   |                                                                                     |
| Asif Sangrasi             | Addenbrooke's Hospital,<br>University of Cambridge,<br>Cambridge, CB2 0QQ, UK                                                           |                                                                                   |                                                                                     |
| Benjamin Thomas           | Addenbrooke's Hospital,<br>University of Cambridge,<br>Cambridge, CB2 0QQ, UK                                                           |                                                                                   |                                                                                     |
| Beverley Haynes           | Addenbrooke's Hospital,<br>University of Cambridge,<br>Cambridge, CB2 0QQ, UK                                                           |                                                                                   |                                                                                     |

|                    |                                                                                                  |                                                                                                          |                                                       |
|--------------------|--------------------------------------------------------------------------------------------------|----------------------------------------------------------------------------------------------------------|-------------------------------------------------------|
| Charlie Massie     | Urological Research Laboratory, Cancer Research UK, Cambridge Institute, Cambridge, CB2 0RE, UK. |                                                                                                          |                                                       |
| Christof Kastner   | Addenbrooke's Hospital, University of Cambridge, Cambridge, CB2 0QQ, UK                          |                                                                                                          |                                                       |
| Colin Cooper       | The Institute Of Cancer Research, London, SW7 3RP, UK                                            | Norwich Medical School, University of East Anglia, Norwich, NR4 7TJ, UK                                  |                                                       |
| Daniel S. Brewer   | The Institute Of Cancer Research, London, SW7 3RP, UK                                            | The Earldom Institute, Norwich, NR4 7UH                                                                  |                                                       |
| David E.Neal       | Urological Research Laboratory, Cancer Research UK, Cambridge Institute, Cambridge, CB2 0RE, UK. | Department of Surgical Oncology, University of Cambridge, Addenbrooke's Hospital, Cambridge, CB2 0QQ, UK |                                                       |
| Elizabeth Cromwell | Addenbrooke's Hospital, University of Cambridge, Cambridge, CB2 0QQ, UK                          |                                                                                                          |                                                       |
| Gillian Basnett    | Addenbrooke's Hospital, University of Cambridge, Cambridge, CB2 0QQ, UK                          |                                                                                                          |                                                       |
| Greg Shaw          | Addenbrooke's Hospital, University of Cambridge, Cambridge, CB2 0QQ, UK                          |                                                                                                          |                                                       |
| Hansley Coret      | Addenbrooke's Hospital, University of Cambridge, Cambridge, CB2 0QQ, UK                          |                                                                                                          |                                                       |
| Hayley Luxton      | Addenbrooke's Hospital, University of Cambridge, Cambridge, CB2 0QQ, UK                          |                                                                                                          |                                                       |
| Hayley Whitaker    | Addenbrooke's Hospital, University of Cambridge, Cambridge, CB2 0QQ, UK                          |                                                                                                          |                                                       |
| Helen Ross-Adams   | Cancer Research UK Cambridge Institute, University of Cambridge, Cambridge CB2 0RE, UK           |                                                                                                          |                                                       |
| Henrik Gronberg    | Academic Urology Group, University of Cambridge, Cambridge, UK                                   |                                                                                                          |                                                       |
| Ian Mills          | Cancer Research UK Cambridge Institute, University of Cambridge, Cambridge CB2 0RE, UK           | Prostate Cancer Research Group, Centre for Molecular Medicine Norway,                                    | Department of Molecular Oncology, Institute of Cancer |

|                |                                                                                                |                                                                                        |                                              |
|----------------|------------------------------------------------------------------------------------------------|----------------------------------------------------------------------------------------|----------------------------------------------|
|                |                                                                                                | Nordic EMBL Partnership, University of Oslo and Oslo University Hospital, Oslo, Norway | Research, University Hospitals, Oslo, Norway |
| Indu Francis   | Addenbrooke's Hospital, University of Cambridge, Cambridge, CB2 0QQ, UK                        |                                                                                        |                                              |
| James Hadfield | Cancer Research UK Cambridge Institute, University of Cambridge, Cambridge CB2 0RE, UK         |                                                                                        |                                              |
| Jeremy Clark   | University of East Anglia, Norwich Research Park, Norwich, NR4 7TJ, UK                         |                                                                                        |                                              |
| Jo Burge       | Addenbrooke's Hospital, University of Cambridge, Cambridge, CB2 0QQ, UK                        |                                                                                        |                                              |
| Jodi Miller    | Cancer Research UK Cambridge Institute, University of Cambridge, Cambridge CB2 0RE, UK         |                                                                                        |                                              |
| Johan Lindberg | Department of Medical Epidemiology and Biostatistics, Karolinska Institutet, Stockholm, Sweden |                                                                                        |                                              |
| Jonathan Kay   | Addenbrooke's Hospital, University of Cambridge, Cambridge, CB2 0QQ, UK                        |                                                                                        |                                              |
| Karan Wadhwa   | Cancer Research UK Cambridge Institute, University of Cambridge, Cambridge CB2 0RE, UK         |                                                                                        |                                              |
| Keval Patel    | Addenbrooke's Hospital, University of Cambridge, Cambridge, CB2 0QQ, UK                        |                                                                                        |                                              |
| Lars Egevad    | Department of Oncology – Pathology, Karolinska Institutet, Stockholm, Sweden                   |                                                                                        |                                              |
| Marie Corcoran | Addenbrooke's Hospital, University of Cambridge, Cambridge, CB2 0QQ, UK                        |                                                                                        |                                              |
| Mark Dunning   | Cancer Research UK Cambridge Institute, University of Cambridge, Cambridge CB2 0RE, UK         |                                                                                        |                                              |
| Maxine Tran    | Addenbrooke's Hospital, University of Cambridge, Cambridge, CB2 0QQ, UK                        |                                                                                        |                                              |

|                         |                                                                                                 |                                                                             |  |
|-------------------------|-------------------------------------------------------------------------------------------------|-----------------------------------------------------------------------------|--|
| Naomi Sharma            | Addenbrooke's Hospital,<br>University of Cambridge,<br>Cambridge, CB2 0QQ, UK                   |                                                                             |  |
| Nimish Shah             | Addenbrooke's Hospital,<br>University of Cambridge,<br>Cambridge, CB2 0QQ, UK                   |                                                                             |  |
| Oscar Rueda             | Cancer Research UK<br>Cambridge Institute,<br>University of Cambridge,<br>Cambridge CB2 0RE, UK |                                                                             |  |
| Rachel Hurst            | University of East Anglia,<br>Norwich Research Park,<br>Norwich, NR4 7TJ, UK                    |                                                                             |  |
| Rory Stark              | Cancer Research UK<br>Cambridge Institute,<br>University of Cambridge,<br>Cambridge CB2 0RE, UK |                                                                             |  |
| Roslin Russell          | Cancer Research UK<br>Cambridge Institute,<br>University of Cambridge,<br>Cambridge CB2 0RE, UK |                                                                             |  |
| Sara Stearn             | Addenbrooke's Hospital,<br>University of Cambridge,<br>Cambridge, CB2 0QQ, UK                   |                                                                             |  |
| Sarah Vowler            | Cancer Research UK<br>Cambridge Institute,<br>University of Cambridge,<br>Cambridge CB2 0RE, UK |                                                                             |  |
| Satoshi Hori            | Addenbrooke's Hospital,<br>University of Cambridge,<br>Cambridge, CB2 0QQ, UK                   |                                                                             |  |
| Silvia Halim            | Cancer Research UK<br>Cambridge Institute,<br>University of Cambridge,<br>Cambridge CB2 0RE, UK |                                                                             |  |
| Tevita 'Aho             | Addenbrooke's Hospital,<br>University of Cambridge,<br>Cambridge, CB2 0QQ, UK                   |                                                                             |  |
| Thomas Whittington      | Academic Urology Group,<br>University of Cambridge,<br>Cambridge, UK                            |                                                                             |  |
| Vincent<br>Gnanpragasam | Department of Urology,<br>Addenbrooke's Hospital,<br>Cambridge, CB2 0QQ, UK                     | Academic Urology<br>Group, University of<br>Cambridge, Cambridge<br>CB2 0RE |  |
| Wendy Partridge         | Addenbrooke's Hospital,<br>University of Cambridge,<br>Cambridge, CB2 0QQ, UK                   |                                                                             |  |
| Will Howat              | Histopathology & ISH<br>Core Facility, CRUK<br>Cambridge Institute,                             |                                                                             |  |

|             |                                                                                                 |  |  |
|-------------|-------------------------------------------------------------------------------------------------|--|--|
|             | Cambridge CB2 0RE                                                                               |  |  |
| Yinyin Yuan | Cancer Research UK<br>Cambridge Institute,<br>University of Cambridge,<br>Cambridge CB2 0RE, UK |  |  |

## MEMBERS OF THE TCGA CONSORTIUM

| Title | First Name  | Last Name    | Institution                                                                                                                                |
|-------|-------------|--------------|--------------------------------------------------------------------------------------------------------------------------------------------|
| Dr.   | Jaeil       | Ahn          | Georgetown University Department of Biostatistics, Bioinformatics, and Biomathematics, Washington DC 20057                                 |
| Dr.   | Rehan       | Akbani       | The University of Texas MD Anderson Cancer Center, Department of Bioinformatics and Computational Biology, Houston TX 77030                |
| Mr.   | Adrian      | Ally         | Canada's Michael Smith Genome Sciences Centre, BC Cancer Agency, Vancouver, BC V5Z 4S6, Canada                                             |
| Dr.   | Samirkumar  | Amin         | SCBMB Graduate Program, Baylor College of Medicine, Houston, TX USA                                                                        |
| Dr    | Armen       | Aprikian     | Urology Dept., MUHC, Montreal General Hospital, 1650 Cedar Avenue, Montreal, QC, H3G 1A4                                                   |
| Dr.   | Joshua      | Armenia      | Memorial Sloan Kettering Cancer Center, Computational Biology Center, 1275 York Avenue, New York, NY 10065                                 |
| Ms.   | Arshi       | Arora        | Department of Epidemiology and Biostatistics, Memorial Sloan-Kettering Cancer Center                                                       |
| Dr.   | J. Todd     | Auman        | Eshelman School of Pharmacy, University of North Carolina at Chapel Hill, Chapel Hill, NC 27599 USA                                        |
| Ms.   | Miruna      | Balasundaram | Canada's Michael Smith Genome Sciences Centre, BC Cancer Agency, Vancouver, BC V5Z 4S6, Canada                                             |
| Mr.   | Saianand    | Balu         | Lineberger Comprehensive Cancer Center, University of North Carolina at Chapel Hill, Chapel Hill, NC 27599 USA                             |
| Dr.   | Christopher | Benz         | 8001 Redwood Blvd., Novato, CA 94945                                                                                                       |
| Dr    | Alain       | Bergeron     | Centre de recherche de l'Hôtel-Dieu de Québec, 10, McMahon Street, Québec, QC, G1R 2J6                                                     |
| Dr.   | Rameen      | Beroukhim    | The Eli and Edythe L. Broad Institute of Massachusetts Institute of Technology and Harvard University Cambridge, Massachusetts 02142, USA. |
| Mr.   | Mario       | Berrios      | University of Southern California, USC/Norris Comprehensive Cancer Center, 1450 Biggy St., NRT G511, Los Angeles, CA 90033                 |

|     |                |                 |                                                                                                                                                      |
|-----|----------------|-----------------|------------------------------------------------------------------------------------------------------------------------------------------------------|
| Mr. | Tom            | Bodenheimer     | Lineberger Comprehensive Cancer Center, University of North Carolina at Chapel Hill, Chapel Hill, NC 27599 USA                                       |
| Ms. | Lori           | Boice           | UNC Tissue Procurement Facility, Department of Pathology, UNC Lineberger Cancer Center, Chapel Hill, NC 27599, USA                                   |
| Mr. | Moiz S.        | Bootwalla       | University of Southern California, USC/Norris Comprehensive Cancer Center, 1450 Biggy St., NRT G511, Los Angeles, CA 90033                           |
| Dr. | Rodolfo        | Borges dos Reis | Department of Surgery and Anatomy, Ribeirão Preto Medical School - FMRP, University of São Paulo, Brazil, 14049-900                                  |
| Dr. | Paul C.        | Boutros         | Ontario Institute for Cancer Research, M5G 0A3, Toronto, Ontario, Canada                                                                             |
| Mr. | Jay            | Bowen           | The Research Institute at Nationwide Children's Hospital, Columbus, OH 43205                                                                         |
| Ms. | Reanne         | Bowlby          | Canada's Michael Smith Genome Sciences Centre, BC Cancer Agency, Vancouver, BC V5Z 4S6, Canada                                                       |
| Dr. | Jeff           | Boyd            | Fox Chase Cancer Center, 333 Cottman Ave., Philadelphia, PA 19111                                                                                    |
| Dr. | Robert K.      | Bradley         | Computational Biology Program, Public Health Sciences Division and Basic Sciences Division, Fred Hutchinson Cancer Research Center, Seattle WA 98109 |
| Dr. | Anne           | Breggia         | Maine Medical Center, 22 Bramhall St, Portland, ME 04102                                                                                             |
| Dr  | Fadi           | Brimo           | Pathology Dept., MUHC, Montreal General Hospital, 1650 Cedar Avenue, Montreal, QC, H3G 1A4                                                           |
| Dr. | Christopher A. | Bristow         | Institute for Applied Cancer Science, Department of Genomic Medicine, The University of Texas MD Anderson Cancer Center, Houston, TX 77030, USA      |
| Dr. | Denise         | Brooks          | Canada's Michael Smith Genome Sciences Centre, BC Cancer Agency, Vancouver, BC V5Z 4S6, Canada                                                       |
| Dr. | Bradley M.     | Broom           | The University of Texas MD Anderson Cancer Center, Department of Bioinformatics and Computational Biology, Houston TX 77030                          |

|     |                 |                 |                                                                                                                                            |
|-----|-----------------|-----------------|--------------------------------------------------------------------------------------------------------------------------------------------|
| Dr. | Alan H.         | Bryce           | Mayo Clinic, 13400 E Shea Blvd, Scottsdale, AZ 85259                                                                                       |
| Dr. | Glenn           | Bubley          | Beth Israel Deaconess medical Center, Boston, MA 02215                                                                                     |
| Dr. | Eric            | Burks           | Lahey Hospital & Medical Center, 41 Mall Road, Burlington, MA 01805                                                                        |
| Mr. | Yaron S.N.      | Butterfield     | Canada's Michael Smith Genome Sciences Centre, BC Cancer Agency, Vancouver, BC V5Z 4S6, Canada                                             |
| Dr. | David           | Canes           | Lahey Hospital & Medical Center, 41 Mall Road, Burlington, MA 01805                                                                        |
| Dr. | Carlos Gilberto | Carlotti Junior | Department of Surgery and Anatomy, Ribeirão Preto Medical School - FMRP, University of São Paulo, Brazil, 14049-900                        |
| Ms. | Rebecca         | Carlsen         | Canada's Michael Smith Genome Sciences Centre, BC Cancer Agency, Vancouver, BC V5Z 4S6, Canada                                             |
| Dr. | Michel          | Carmel          | CHUS, Hôpital Fleurimont, 3001, 12 avenue north, Sherbrooke, QC, J1H 5N4                                                                   |
| Dr. | Peter R.        | Carroll         | University of CA San Francisco                                                                                                             |
| Dr. | Scott L.        | Carter          | The Eli and Edythe L. Broad Institute of Massachusetts Institute of Technology and Harvard University Cambridge, Massachusetts 02142, USA. |
| Dr. | Richard         | Cartun          | Dept of Pathology, Hartford Hospital, 80 Seymour Street, Hartford, CT 06102                                                                |
| Dr. | June M.         | Chan            | University of CA San Francisco                                                                                                             |
| Mr. | Matthew         | Chang           | Memorial Sloan Kettering Cancer Center, Center for Molecular Oncology, 1275 York Avenue, New York, NY 10065                                |
| Dr. | Yu              | Chen            | Human Oncology and Pathogenesis Program, and Department of Medicine; Memorial Sloan Kettering Cancer Center, New York, NY 10065            |
| Dr. | Andrew D.       | Cherniack       | The Eli and Edythe L. Broad Institute of Massachusetts Institute of Technology and Harvard University Cambridge, Massachusetts 02142, USA. |
| Dr. | Simone          | Chevalier       | Research Glen site of the MUHC, Urology Dept., 1001 Decarie Blvd, Montreal, QC, H4A 3J1                                                    |



|     |            |            |                                                                                                                                                 |
|-----|------------|------------|-------------------------------------------------------------------------------------------------------------------------------------------------|
| Dr. | Lynda      | Chin       | Institute for Applied Cancer Science, Department of Genomic Medicine, The University of Texas MD Anderson Cancer Center, Houston, TX 77030, USA |
| Mr. | Andy       | Chu        | Canada's Michael Smith Genome Sciences Centre, BC Cancer Agency, Vancouver, BC V5Z 4S6, Canada                                                  |
| Mr. | Eric       | Chuah      | Canada's Michael Smith Genome Sciences Centre, BC Cancer Agency, Vancouver, BC V5Z 4S6, Canada                                                  |
| Ms. | Sudha      | Chudamani  | Leidos Biomedical, 9609 Medical Center Dr Rockville, MD 20850                                                                                   |
| Dr. | Giovanni   | Ciriello   | MSKCC, New York, 10065                                                                                                                          |
| Ms. | Amanda     | Clarke     | Canada's Michael Smith Genome Sciences Centre, BC Cancer Agency, Vancouver, BC V5Z 4S6, Canada                                                  |
| Dr. | Matthew R. | Cooperberg | University of CA San Francisco                                                                                                                  |
| Dr. | Niall M.   | Corcoran   | Department of Surgery, University of Melbourne, Parkville, VIC 3050, Australia                                                                  |
| Dr. | Anthony J. | Costello   | Epworth Prostate Centre, Richmond, VIC 3121, Australia                                                                                          |
|     | Janet      | Cowan      | University of CA San Francisco                                                                                                                  |
| Mr. | Daniel     | Crain      | International Genomics Consortium, 445 N. 5th Street, Phoenix, AZ 85004                                                                         |
| Ms. | Erin       | Curley     | International Genomics Consortium, 445 N. 5th Street, Phoenix, AZ 85004                                                                         |
| Dr. | Kerstin    | David      | Indivumed GmbH                                                                                                                                  |
| Mr. | John A.    | Demchok    | National Cancer Institute, 31 Center Dr, 3A20, Bethesda, MD 20892                                                                               |
| Dr  | Francesca  | Demichelis | Centre for Integrative Biology, University of Trento, Povo Trento 38123, Italy                                                                  |
| Ms. | Noreen     | Dhalla     | Canada's Michael Smith Genome Sciences Centre, BC Cancer Agency, Vancouver, BC V5Z 4S6, Canada                                                  |
| Dr. | Rajiv      | Dhir       | University of Pittsburgh Pittsburgh, PA 15261                                                                                                   |
| Dr  | Alexandre  | Doueik     | Dept. of Pathology, Santa Cabrini Hospital, 6887 Chatelain Street, Montreal, QC, H1T 3X7                                                        |
| Dr. | Bettina    | Drake      | Washington University                                                                                                                           |

|     |           |                |                                                                                                                                            |
|-----|-----------|----------------|--------------------------------------------------------------------------------------------------------------------------------------------|
| Dr. | Heidi     | Dvinge         | Basic Sciences Division, Fred Hutchinson Cancer Research Center, 1100 Fairview Av. N, Seattle, WA 98109                                    |
| Ms. | Ina       | Felau          | National Cancer Institute, 31 Center Dr, 3A20, Bethesda, MD 20892                                                                          |
| Dr. | Martin L. | Ferguson       | National Cancer Institute, 31 Center Dr, 3A20, Bethesda, MD 20893                                                                          |
| Dr. | Stephen   | Freedland      | Cedars Sinai Medical Center, Los Angeles, CA 90048                                                                                         |
| Dr. | Yao       | Fu             | Program in Computational Biology and Bioinformatics, Yale University, Bass 432, 266 Whitney Ave, New Haven, CT 06520                       |
| Dr. | Stacey B. | Gabriel        | The Eli and Edythe L. Broad Institute of Massachusetts Institute of Technology and Harvard University Cambridge, Massachusetts 02142, USA. |
| Dr. | Jianjiong | Gao            | Memorial Sloan Kettering Cancer Center, Center for Molecular Oncology, 1275 York Avenue, New York, NY 10065                                |
| Ms. | Johanna   | Gardner        | International Genomics Consortium, 445 N. 5th Street, Phoenix, AZ 85004                                                                    |
| Dr. | Julie M.  | Gastier-Foster | The Research Institute at Nationwide Children's Hospital, Columbus, OH 43205                                                               |
| Mr. | Mark      | Gerken         | The Research Institute at Nationwide Children's Hospital, Columbus, OH 43205                                                               |
| Dr. | Mark      | Gerstein       | Program in Computational Biology and Bioinformatics, Yale University, Bass 432, 266 Whitney Ave, New Haven, CT 06520                       |
| Dr. | Andrew K. | Godwin         | University of Kansas Medical Center, Department of Pathology and Laboratory Medicine, 3901 Rainbow Blvd, Kansas City, KS 66160             |
| Dr. | Anuradha  | Gopalan        | Memorial Sloan Kettering Cancer Center, 1275 York Avenue                                                                                   |
| Dr. | Markus    | Graefen        | Martini-Clinic, Prostate Cancer Center, University Medical Center Hamburg Eppendorf, Martinistr. 52, 20246 Hamburg, Germany                |
| Mr. | Ranabir   | Guin           | Canada's Michael Smith Genome Sciences Centre, BC                                                                                          |

|     |                |              |                                                                                                                                                 |
|-----|----------------|--------------|-------------------------------------------------------------------------------------------------------------------------------------------------|
|     |                |              | Cancer Agency, Vancouver, BC V5Z 4S6, Canada                                                                                                    |
| Mr. | Manaswi        | Gupta        | The Eli and Edythe L. Broad Institute of Massachusetts Institute of Technology and Harvard University Cambridge, Massachusetts 02142, USA.      |
| Dr. | Angela         | Hadjipanayis | Department of Genetics, Harvard Medical School, Boston, MA 02115, USA                                                                           |
| Dr. | Syed           | Haider       | Ontario Institute for Cancer Research, M5G 0A3, Toronto, Ontario, Canada                                                                        |
| Dr. | Lucie          | Hamel        | Research Glen site of the MUHC, Urology Dept., 1001 Decarie Blvd, Montreal, QC, H4A 3J1                                                         |
| Dr. | D. Neil        | Hayes        | Department of Internal Medicine, Division of Medical Oncology, University of North Carolina at Chapel Hill, Chapel Hill, NC 27599 USA           |
| Mr. | David I.       | Heiman       | The Eli and Edythe L. Broad Institute of Massachusetts Institute Of Technology and Harvard University<br>415 Main Street<br>Cambridge, MA 02142 |
| Dr. | Katherine A.   | Hoadley      | Department of Genetics, University of North Carolina at Chapel Hill, Chapel Hill, NC 27599 USA                                                  |
| Ms. | Andrea H.      | Holbrook     | University of Southern California, USC/Norris Comprehensive Cancer Center, 1450 Biggy St., NRT G511, Los Angeles, CA 90033                      |
| Dr. | Robert A.      | Holt         | Canada's Michael Smith Genome Sciences Centre, BC Cancer Agency, Vancouver, BC V5Z 4S6, Canada                                                  |
| Dr. | Antonia        | Holway       | Lahey Hospital & Medical Center, 41 Mall Road, Burlington, MA 01805                                                                             |
| Dr. | Christopher M. | Hovens       | Department of Surgery, University of Melbourne, Parkville, VIC 3050 Australia                                                                   |
| Mr. | Alan P.        | Hoyle        | Lineberger Comprehensive Cancer Center, University of North Carolina at Chapel Hill, Chapel Hill, NC 27599 USA                                  |
| Dr. | Mei            | Huang        | UNC Tissue Procurement Facility, UNC Lineberger Cancer Center, Chapel Hill, NC 27599, USA                                                       |
| Dr. | Carolyn M.     | Hutter       | National Human Genome Research Institute, National Institutes of Health, 5635 Fishers Lane, Bethesda, MD                                        |

|     |             |              |                                                                                                                                                                                     |
|-----|-------------|--------------|-------------------------------------------------------------------------------------------------------------------------------------------------------------------------------------|
|     |             |              | 20892-9305                                                                                                                                                                          |
| Dr. | Michael     | Ittmann      | Baylor College of Medicine                                                                                                                                                          |
| Dr. | Lisa        | Iype         | Institute for Systems Biology, Seattle Washington 98109                                                                                                                             |
| Dr. | Stuart R.   | Jefferys     | Lineberger Comprehensive Cancer Center, University of North Carolina at Chapel Hill, Chapel Hill, NC 27599 USA                                                                      |
| Dr. | Steven J.M. | Jones        | Canada's Michael Smith Genome Sciences Centre, BC Cancer Agency, Vancouver, BC V5Z 4S6, Canada                                                                                      |
| Dr. | Corbin D.   | Jones        | Department of Biology, University of North Carolina at Chapel Hill, Chapel Hill, NC 27599 USA                                                                                       |
| Dr. | Hartmut     | Juhl         | Indivumed GmbH                                                                                                                                                                      |
| Dr. | Andre       | Kahles       | Memorial Sloan Kettering Cancer Center, Computational Biology Center, 1275 York Avenue, New York, NY 10065                                                                          |
| Ms. | Katayoon    | Kasaian      | Canada's Michael Smith Genome Sciences Centre, BC Cancer Agency, Vancouver, BC V5Z 4S6, Canada                                                                                      |
| Mr. | Michael     | Kerger       | Epworth Prostate Centre, Richmond, VIC 3121, Australia                                                                                                                              |
| Dr. | Ekta        | Khurana      | Department of Physiology and Biophysics, Weill Cornell Medical College of Cornell University, 1305 York Avenue, New York, NY 10065                                                  |
| Dr. | Robert      | Klein        | Icahn Institute for Genomics and Multiscale Biology, Department of Genetics and Genomic Sciences, Icahn School of Medicine at Mt Sinai, 1 Gustave L. Levy Place, New York, NY 10029 |
| Dr. | Raju        | Kucherlapati | Department of Genetics, Harvard Medical School, Boston, MA 02115, USA                                                                                                               |
| Dr. | Louis       | Lacombe      | Centre de recherche de l'Hôtel-Dieu de Québec, 10, McMahon Street, Québec, QC, G1R 2J6                                                                                              |
| Dr. | Marc        | Ladanyi      | MSKCC, New York, 10065                                                                                                                                                              |
| Mr. | Phillip H.  | Lai          | University of Southern California, USC/Norris Comprehensive Cancer Center, 1450 Biggy St., NRT G511, Los Angeles, CA 90033                                                          |
| Dr. | Peter W.    | Laird        | Center for Epigenetics<br>Van Andel Institute,<br>333 Bostwick Ave N.E. Grand Rapids, MI 49503                                                                                      |

|     |            |             |                                                                                                                             |
|-----|------------|-------------|-----------------------------------------------------------------------------------------------------------------------------|
| Dr  | Mathieu    | Latour      | Centre hospitalier St-Luc du CHUM, 1058, rue St-Denis, Montréal, QC, H2X 3J4                                                |
| Mr. | Kevin      | Lau         | International Genomics Consortium, 445 N. 5th Street, Phoenix, AZ 85004                                                     |
| Ms. | Darlene    | Lee         | Canada's Michael Smith Genome Sciences Centre, BC Cancer Agency, Vancouver, BC V5Z 4S6, Canada                              |
| Dr. | Semin      | Lee         | Center for Biomedical Informatics, Harvard Medical School, Boston, MA 02115, USA                                            |
| Dr. | Kjong-Van  | Lehmann     | Memorial Sloan Kettering Cancer Center, Computational Biology Center, 1275 York Avenue, New York, NY 10065                  |
| Ms. | Kristen M. | Leraas      | The Research Institute at Nationwide Children's Hospital, Columbus, OH 43205                                                |
| Mr. | Robert     | Leung       | Weill Cornell Medical College, Department of Urology, New York, NY 10021                                                    |
| Dr. | John A.    | Libertino   | Lahey Hospital & Medical Center, 41 Mall Road, Burlington, MA 01805                                                         |
| Ms. | Tara M.    | Lichtenberg | The Research Institute at Nationwide Children's Hospital, Columbus, OH 43205                                                |
| Dr. | W. Marston | Linehan     | National Cancer Institute, Urologic Oncology Branch, 10 Center Dr, CRC, Rm 1-5940, Bethesda, MD 20892-1107                  |
| Dr. | Shiyun     | Ling        | The University of Texas MD Anderson Cancer Center, Department of Bioinformatics and Computational Biology, Houston TX 77030 |
| Dr. | Scott M.   | Lippman     | UC San Diego Moores Cancer Center, 3855 Health Sciences Drive MC 0685, La Jolla, CA 92093                                   |
| Dr. | Wenbin     | Liu         | The University of Texas MD Anderson Cancer Center, Department of Bioinformatics and Computational Biology, Houston TX 77030 |
| Dr. | Jia        | Liu         | Leidos Biomedical, 9609 Medical Center Dr Rockville, MD 20850                                                               |
| Mr. | Lucas      | Lochovsky   | Program in Computational Biology and Bioinformatics, Yale University, Bass 432, 266 Whitney Ave, New Haven, CT 06520        |
| Dr  | Massimo    | Loda        | Department of Pathology, Dana-Farber Cancer Institute,                                                                      |

|      |             |             |                                                                                                                                                       |
|------|-------------|-------------|-------------------------------------------------------------------------------------------------------------------------------------------------------|
|      |             |             | 450 Brookline Ave, Boston MA 02215                                                                                                                    |
| Dr.  | Christopher | Logothetis  | The Univeristy of Texas MD Anderson Cancer Center<br>1515 Holcombe Blvd Unit 1374<br>Houston. TX 77030                                                |
| Ms.  | Laxmi       | Lolla       | Leidos Biomedical, 9609 Medical Center Dr Rockville, MD<br>20850                                                                                      |
| Dr.  | Teri        | Longacre    | Stanford Cancer Institute, Stanford Medicine, 300 Pasteur<br>Drive, Stanford, CA 94305                                                                |
| Dr.  | Yiling      | Lu          | The University of Texas MD Anderson Cancer Center,<br>Department of Systems Biology, Houston TX 77030                                                 |
| Dr.  | Jianhua     | Luo         | University of Pittsburgh                                                                                                                              |
| Dr.  | Yussanne    | Ma          | Canada's Michael Smith Genome Sciences Centre, BC<br>Cancer Agency, Vancouver, BC V5Z 4S6, Canada                                                     |
| Mr.  | Harshad S.  | Mahadeshwar | Institute for Applied Cancer Science, Department of<br>Genomic Medicine, The University of Texas MD Anderson<br>Cancer Center, Houston, TX 77030, USA |
| Mr.  | David       | Mallery     | International Genomics Consortium, 445 N. 5th Street,<br>Phoenix, AZ 85004                                                                            |
| Dr.  | Marco A.    | Marra       | Canada's Michael Smith Genome Sciences Centre, BC<br>Cancer Agency, Vancouver, BC V5Z 4S6, Canada                                                     |
| Mr.  | Michael     | Mayo        | Canada's Michael Smith Genome Sciences Centre, BC<br>Cancer Agency, Vancouver, BC V5Z 4S6, Canada                                                     |
| Dr.  | Shannon     | McCall      | Department of Pathology, Duke Cancer Institute, 200<br>Trent Drive, Durham, NC 27710                                                                  |
| Mrs. | Ginette     | McKercher   | 1320 Graham Blvd, suite 110, Town of Mount-Royal, QC,<br>H3P 3C8                                                                                      |
| Dr.  | Shaowu      | Meng        | Lineberger Comprehensive Cancer Center, University of<br>North Carolina at Chapel Hill, Chapel Hill, NC 27599 USA                                     |
| Dr.  | Maria J.    | Merino      | Laboratory of Pathology, National Cancer Institute, NIH,<br>Bethesda, MD                                                                              |
| Dr   | Anne-Marie  | Mes-Masson  | CRCHUM, 900 St-Denis Street, Tour Viger, Montreal, QC,<br>H2X 0A9                                                                                     |
| Dr.  | Matthew     | Meyerson    | The Eli and Edythe L. Broad Institute of Massachusetts<br>Institute of Technology and Harvard University Cambridge,                                   |

|     |            |             |                                                                                                                                            |
|-----|------------|-------------|--------------------------------------------------------------------------------------------------------------------------------------------|
|     |            |             | Massachusetts 02142, USA.                                                                                                                  |
| Dr. | Piotr A.   | Mieczkowski | Department of Genetics, University of North Carolina at Chapel Hill, Chapel Hill, NC 27599 USA                                             |
| Dr. | Gordon B.  | Mills       | The University of Texas MD Anderson Cancer Center, Department of Systems Biology, Houston TX 77030                                         |
| Dr. | Sarah      | Minner      | Dpt. of Pathology, University Medical Center Hamburg Eppendorf, Martinistr. 52, 20246 Hamburg, Germany                                     |
| Dr. | Alireza    | Moinzadeh   | Lahey Hospital & Medical Center, 41 Mall Road, Burlington, MA 01805                                                                        |
| Dr. | Richard A. | Moore       | Canada's Michael Smith Genome Sciences Centre, BC Cancer Agency, Vancouver, BC V5Z 4S6, Canada                                             |
| Dr. | Scott      | Morris      | International Genomics Consortium, 445 N. 5th Street, Phoenix, AZ 85004                                                                    |
| Mr. | Lisle E.   | Mose        | Lineberger Comprehensive Cancer Center, University of North Carolina at Chapel Hill, Chapel Hill, NC 27599 USA                             |
| Dr. | Andrew J.  | Mungall     | Canada's Michael Smith Genome Sciences Centre, BC Cancer Agency, Vancouver, BC V5Z 4S6, Canada                                             |
| Mr  | Bradley A. | Murray      | The Eli and Edythe L. Broad Institute of Massachusetts Institute of Technology and Harvard University Cambridge, Massachusetts 02142, USA. |
| Dr. | Jerome B.  | Myers       | Penrose-St. Francis Health Services<br>Dept. of Pathology<br>2222 N. Nevada Ave<br>Colorado Springs, CO 80907                              |
| Ms. | Rashi      | Naresh      | SRA International, 4300 Fair Lakes Court<br>Fairfax, VA 22033                                                                              |
| Dr. | Peter S.   | Nelson      | Division of Human Biology, Fred Hutchinson Cancer Research Center, Seattle, WA 98109                                                       |
| Dr. | Mark A.    | Nelson      | University of Arizona                                                                                                                      |
| Dr. | Joel       | Nelson      | University of Pittsburgh Pittsburgh, PA 15261                                                                                              |
| Dr. | Houtan     | Noushmehr   | Department of Genetics, Ribeirão Preto Medical School - FMRP, University of São Paulo, Brazil, 14049-900                                   |
| Dr. | Angeliki   | Pantazi     | Department of Genetics, Harvard Medical School, Boston,                                                                                    |

|     |            |               |                                                                                                                                                 |
|-----|------------|---------------|-------------------------------------------------------------------------------------------------------------------------------------------------|
|     |            |               | MA 02115, USA                                                                                                                                   |
| Dr. | Michael    | Parfenov      | Department of Genetics, Harvard Medical School, Boston, MA 02115, USA                                                                           |
| Dr. | Peter J.   | Park          | Center for Biomedical Informatics, Harvard Medical School, Boston, MA 02115, USA                                                                |
| Dr. | Joel S.    | Parker        | Department of Genetics, University of North Carolina at Chapel Hill, Chapel Hill, NC 27599 USA                                                  |
| Dr. | Joseph     | Paulauskis    | International Genomics Consortium, 445 N. 5th Street, Phoenix, AZ 85004                                                                         |
| Dr. | Robert     | Penny         | International Genomics Consortium, 445 N. 5th Street, Phoenix, AZ 85004                                                                         |
| Dr. | Charles M. | Perou         | Department of Genetics, University of North Carolina at Chapel Hill, Chapel Hill, NC 27599 USA                                                  |
| Dr. | Alain      | Piché         | CHUS, Hôpital Fleurimont, 3001, 12 avenue north, Sherbrooke, QC, J1H 5N4                                                                        |
| Dr. | Todd       | Pihl          | SRA International, 4300 Fair Lakes Court Fairfax, VA 22033                                                                                      |
| Dr. | Peter A.   | Pinto         | National Cancer Institute, Urologic Oncology Branch, 10 Center Dr, CRC, Rm 1-5940, Bethesda, MD 20892-1107                                      |
| Dr. | Davide     | Prandi        | Centre for Integrative Biology, University of Trento, Povo Trento 38123, Italy                                                                  |
| Dr. | Alexei     | Protopopov    | Institute for Applied Cancer Science, Department of Genomic Medicine, The University of Texas MD Anderson Cancer Center, Houston, TX 77030, USA |
| Dr. | Kenna      | R. Mills Shaw | MD Anderson Cancer Center, Houston, TX 77230                                                                                                    |
| Dr. | Nilsa C.   | Ramirez       | The Research Institute at Nationwide Children's Hospital, Columbus, OH 43205                                                                    |
| Dr. | Arvind     | Rao           | The University of Texas MD Anderson Cancer Center, Department of Bioinformatics and Computational Biology, Houston TX 77030                     |
| Dr. | W. K.      | Rathmell      | Lineberger Comprehensive Cancer Center, University of North Carolina at Chapel Hill, Chapel Hill, NC 27599 USA                                  |
| Dr. | Gunnar     | Rätsch        | Memorial Sloan Kettering Cancer Center, Computational                                                                                           |



|         |           |               |                                                                                                                                                    |
|---------|-----------|---------------|----------------------------------------------------------------------------------------------------------------------------------------------------|
|         |           |               | Biology Center, 1275 York Avenue, New York, NY 10065                                                                                               |
| Ms.     | Xiaojia   | Ren           | Department of Genetics, Harvard Medical School, Boston, MA 02115, USA                                                                              |
| Dr.     | Victor    | Reuter        | Memorial Sloan Kettering Cancer Center, Department of Pathology, 1275 York Avenue, New York, NY 10065                                              |
| Dr.     | Sheila M. | Reynolds      | Institute for Systems Biology, Seattle Washington 98109                                                                                            |
| Dr.     | Suhn K.   | Rhie          | Norris Comprehensive Cancer Center<br>Keck School of Medicine<br>University of Southern California, 1441 Eastlake Avenue,<br>Los Angeles, CA 90033 |
| Dr.     | Kimberly  | Rieger-Christ | Lahey Hospital & Medical Center, 41 Mall Road,<br>Burlington, MA 01805                                                                             |
| Dr.     | Jeffrey   | Roach         | Research Computing Center, University of North Carolina<br>at Chapel Hill, Chapel Hill, NC 27599 USA                                               |
| Dr.     | A. Gordon | Robertson     | Canada's Michael Smith Genome Sciences Centre, BC<br>Cancer Agency, Vancouver, BC V5Z 4S6, Canada                                                  |
| Dr.     | Brian     | Robinson      | Weill Cornell Medical College, Department of Pathology &<br>Laboratory Medicine, 1300 York Avenue, New York, NY<br>10065                           |
| Dr.     | Mark A.   | Rubin         | Weill Cornell Medical College of Cornell University                                                                                                |
| Dr      | Fred      | Saad          | CRCHUM, 900 St-Denis Street, Tour Viger, Montreal, QC,<br>H2X 0A9                                                                                  |
| Dr.     | Sara      | Sadeghi       | Canada's Michael Smith Genome Sciences Centre, BC<br>Cancer Agency, Vancouver, BC V5Z 4S6, Canada                                                  |
| Mr.     | Gordon    | Saksena       | The Eli and Edythe L. Broad Institute of Massachusetts<br>Institute of Technology and Harvard University Cambridge,<br>Massachusetts 02142, USA.   |
| Dr.     | Charles   | Saller        | Analytical Biological Services<br>701 Cornell Drive<br>Wilmington, DE 19801                                                                        |
| Dr.     | Andrew    | Salner        | Gray Cancer Center, Hartford Hospital, 80 Seymour Street,<br>Hartford, CT 06102                                                                    |
| NoTitle | Chris     | Sander        | Dana-Farber Cancer Institute, 450 Brookline Ave, Boston<br>MA 02215                                                                                |

|      |               |            |                                                                                                                                                                                                                                |
|------|---------------|------------|--------------------------------------------------------------------------------------------------------------------------------------------------------------------------------------------------------------------------------|
| Dr.  | George        | Sandusky   | Indiana University, Dept Pathology, Med AScience Bldg Rm 128, 635 Barnhill Drive, Indianapolis                                                                                                                                 |
| Dr.  | Guido         | Sauter     | Dpt. of Pathology, University Medical Center Hamburg Eppendorf, Martinistr. 52, 20246 Hamburg, Germany                                                                                                                         |
| Dr.  | Andrea        | Sboner     | Weill Cornell Medical College of Cornell University; Department of Pathology and Laboratory Medicine, Institute for Computational Biomedicine, Institute for Precision Medicine, 1305 York Ave, New York, NY 10021             |
| Mrs. | Eleonora      | Scarlata   | Research Glen site of the MUHC, Urology Dept., 1001 Decarie Blvd, Montreal, QC, H4A 3J1                                                                                                                                        |
| Ms.  | Jacqueline E. | Schein     | Canada's Michael Smith Genome Sciences Centre, BC Cancer Agency, Vancouver, BC V5Z 4S6, Canada                                                                                                                                 |
| Dr.  | Thorsten      | Schlomm    | Martini-Clinic, Prostate Cancer Center, University Medical Center Hamburg Eppendorf, Martinistr. 52, 20246 Hamburg, Germany                                                                                                    |
| Dr.  | Laura S.      | Schmidt    | Urologic Oncology Branch, Center for Cancer Research, National Cancer Institute, NIH, Bethesda MD and Basic Science Program, Leidos Biomedical Research, Inc, Frederick National Laboratory for Cancer Research, Frederick, MD |
| Dr.  | Nikolaus      | Schultz    | Memorial Sloan Kettering Cancer Center, Center for Molecular Oncology, 1275 York Avenue, New York, NY 10065                                                                                                                    |
| Mr.  | Steven E.     | Schumacher | The Eli and Edythe L. Broad Institute of Massachusetts Institute of Technology and Harvard University Cambridge, Massachusetts 02142, USA.                                                                                     |
| Dr.  | Jonathan      | Seidman    | Department of Genetics, Harvard Medical School, Boston, MA 02115, USA                                                                                                                                                          |
| Dr.  | Luciano Neder | Serafini   | Department of Pathology, Ribeirão Preto Medical School - FMRP, University of São Paulo, Brazil, 14049-900                                                                                                                      |
| Mr.  | Sahil         | Seth       | Institute for Applied Cancer Science, Department of Genomic Medicine, The University of Texas MD Anderson Cancer Center, Houston, TX 77030, USA                                                                                |
| Ms.  | Alexis        | Sharp      | Department of Pathology, Duke Cancer Institute, 200 Trent Drive, Durham, NC 27710                                                                                                                                              |

|     |            |              |                                                                                                                                            |
|-----|------------|--------------|--------------------------------------------------------------------------------------------------------------------------------------------|
| Mr. | Troy       | Shelton      | International Genomics Consortium, 445 N. 5th Street, Phoenix, AZ 85004                                                                    |
| Ms. | Candace    | Shelton      | International Genomics Consortium, 445 N. 5th Street, Phoenix, AZ 85004                                                                    |
| Dr. | Hui        | Shen         | Center for Epigenetics, Van Andel Institute, 333 Bostwick Ave N.E. Grand Rapids, MI 49503                                                  |
| Dr. | Ronglai    | Shen         | Department of Epidemiology and Biostatistics, Memorial Sloan-Kettering Cancer Center                                                       |
| Dr. | Mark       | Sherman      | International Genomics Consortium, 445 N. 5th Street, Phoenix, AZ 85004                                                                    |
| Ms. | Margi      | Sheth        | National Cancer Institute, 31 Center Dr, 3A20, Bethesda, MD 20892                                                                          |
| Dr. | Yan        | Shi          | Lineberger Comprehensive Cancer Center, University of North Carolina at Chapel Hill, Chapel Hill, NC 27599 USA                             |
| Ms. | Juliann    | Shih         | The Eli and Edythe L. Broad Institute of Massachusetts Institute of Technology and Harvard University Cambridge, Massachusetts 02142, USA. |
| Dr. | Ilya       | Shmulevich   | Institute for Systems Biology, Seattle Washington 98109                                                                                    |
| Dr. | Jeffry     | Simko        | University of CA San Francisco                                                                                                             |
| Dr. | Ronald     | Simon        | Dpt. of Pathology, University Medical Center Hamburg Eppendorf, Martinistr. 52, 20246 Hamburg, Germany                                     |
| Ms. | Janae V.   | Simons       | Lineberger Comprehensive Cancer Center, University of North Carolina at Chapel Hill, Chapel Hill, NC 27599 USA                             |
| Ms. | Payal      | Sipahimalani | Canada's Michael Smith Genome Sciences Centre, BC Cancer Agency, Vancouver, BC V5Z 4S6, Canada                                             |
| Ms. | Tara       | Skelly       | Department of Genetics, University of North Carolina at Chapel Hill, Chapel Hill, NC 27599 USA                                             |
| Dr. | Heidi J.   | Sofia        | National Human Genome Research Institute, National Institutes of Health, 5635 Fishers Lane, Bethesda, MD 20892-9305                        |
| Mr. | Matthew G. | Soloway      | Lineberger Comprehensive Cancer Center, University of North Carolina at Chapel Hill, Chapel Hill, NC 27599 USA                             |
| Dr. | Xingzhi    | Song         | Institute for Applied Cancer Science, Department of Genomic Medicine, The University of Texas MD Anderson                                  |

|     |           |           |                                                                                                                                                                                      |
|-----|-----------|-----------|--------------------------------------------------------------------------------------------------------------------------------------------------------------------------------------|
|     |           |           | Cancer Center, Houston, TX 77030, USA                                                                                                                                                |
| Dr. | Andrea    | Sorcini   | Lahey Hospital & Medical Center, 41 Mall Road, Burlington, MA 01805                                                                                                                  |
| Ms. | Carrie    | Sougnez   | The Eli and Edythe L. Broad Institute of Massachusetts Institute of Technology and Harvard University Cambridge, Massachusetts 02142, USA.                                           |
| Dr. | John      | Stewart   | Wake Forest Baptist Health, 1 Medical Center Boulevard, Winston-Salem, North Carolina, 27157                                                                                         |
| Mr. | Travis B. | Sullivan  | Lahey Hospital & Medical Center, 41 Mall Road, Burlington, MA 01805                                                                                                                  |
| Dr. | Huandong  | Sun       | Institute for Applied Cancer Science, Department of Genomic Medicine, The University of Texas MD Anderson Cancer Center, Houston, TX 77030, USA                                      |
| Dr. | Charlie   | Sun       | SRA International, 4300 Fair Lakes Court Fairfax, VA 22033                                                                                                                           |
| Ms. | Angela    | Tam       | Canada's Michael Smith Genome Sciences Centre, BC Cancer Agency, Vancouver, BC V5Z 4S6, Canada                                                                                       |
| Ms. | Donghui   | Tan       | Department of Genetics, University of North Carolina at Chapel Hill, Chapel Hill, NC 27599 USA                                                                                       |
| Dr. | Jiabin    | Tang      | Institute for Applied Cancer Science, Department of Genomic Medicine, The University of Texas MD Anderson Cancer Center, Houston, TX 77030, USA                                      |
| Dr. | Roy       | Tarnuzzer | National Cancer Institute, 31 Center Dr, 3A20, Bethesda, MD 20892                                                                                                                    |
|     | Katherine | Tarvin    | Analytical Biological Services<br>701 Cornell Drive<br>Wilmington, DE 19801                                                                                                          |
| Dr. | Barry S.  | Taylor    | Human Oncology and Pathogenesis Program, Department of Epidemiology and Biostatistics, and Center for Molecular Oncology; Memorial Sloan Kettering Cancer Center, New York, NY 10065 |
| Mr. | Patrick   | Teebagy   | Lahey Hospital & Medical Center, 41 Mall Road, Burlington, MA 01805                                                                                                                  |
|     | Imelda    | Tenggara  | University of CA San Francisco                                                                                                                                                       |

|     |                         |              |                                                                                                                            |
|-----|-------------------------|--------------|----------------------------------------------------------------------------------------------------------------------------|
| Dr  | Bernard                 | Têtu         | Hôpital du St-Sacrement, CHU de Québec, 1050, chemin Ste-Foy, Québec QC, G1S 4L8                                           |
| Dr. | Ashutosh                | Tewari       | Weill Cornell Medical College, Department of Urology, New York, NY 10021                                                   |
| Ms. | Nina                    | Thiessen     | Canada's Michael Smith Genome Sciences Centre, BC Cancer Agency, Vancouver, BC V5Z 4S6, Canada                             |
| Dr. | Timothy                 | Thompson     | The Univeristy of Texas MD Anderson Cancer Center<br>1515 Holcombe Blvd Unit 0018-3<br>Houston. TX 77030                   |
| Dr. | Leigh B.                | Thorne       | UNC Tissue Procurement Facility, Department of Pathology, UNC Lineberger Cancer Center, Chapel Hill, NC 27599, USA         |
| Dr. | Daniela Pretti da Cunha | Tirapelli    | Department of Surgery and Anatomy, Ribeirão Preto Medical School - FMRP, University of São Paulo, Brazil, 14049-900        |
| Dr. | Scott A.                | Tomlins      | University of Michigan Medical School                                                                                      |
| Dr. | Felipe Amstalden        | Trevisan     | Department of Surgery and Anatomy, Ribeirão Preto Medical School - FMRP, University of São Paulo, Brazil, 14049-900        |
| Dr. | Patricia                | Troncoso     | The Univeristy of Texas MD Anderson Cancer Center<br>1515 Holcombe Blvd Unit 0085<br>Houston. TX 77030                     |
| Dr. | Lawrence                | True         | University of Washington, 1959 NE Pacific St., Seattle, WA, 98195-6100                                                     |
| Dr. | Maria Christina         | Tsourlakis   | Dpt. of Pathology, University Medical Center Hamburg Eppendorf, Martinistr. 52, 20246 Hamburg, Germany                     |
| Dr  | Svitlana                | Tyekucheva   | Dana-Farber Cancer Institute, 450 Brookline Ave, Boston MA 02215                                                           |
| Dr. | Eliezer                 | Van Allen    | Broad Institute of MIT and Harvard<br>415 Main Street<br>Cambridge, MA 02142                                               |
| Dr. | David J.                | Van Den Berg | University of Southern California, USC/Norris Comprehensive Cancer Center, 1450 Biggy St., NRT G511, Los Angeles, CA 90033 |

|     |            |              |                                                                                                                             |
|-----|------------|--------------|-----------------------------------------------------------------------------------------------------------------------------|
| Ms. | Umadevi    | Veluvolu     | Department of Genetics, University of North Carolina at Chapel Hill, Chapel Hill, NC 27599 USA                              |
| Dr. | Roel       | Verhaak      | The University of Texas MD Anderson Cancer Center, Department of Bioinformatics and Computational Biology, Houston TX 77030 |
| Dr. | Cathy D.   | Vocke        | Urologic Oncology Branch, Center for Cancer Research, National Cancer Institute, NIH, Bethesda MD                           |
| Dr. | Yunhu      | Wan          | SRA International, 4300 Fair Lakes Court<br>Fairfax, VA 22033                                                               |
| Dr. | Zhining    | Wang         | National Cancer Institute, 31 Center Dr, 3A20, Bethesda, MD 20892                                                           |
| Dr. | Qingguo    | Wang         | Memorial Sloan Kettering Cancer Center, Center for Molecular Oncology, 1275 York Avenue, New York, NY 10065                 |
| Dr. | Wenyi      | Wang         | The University of Texas MD Anderson Cancer Center, Department of Bioinformatics and Computational Biology, Houston TX 77030 |
| Dr. | Nils       | Weinhold     | Memorial Sloan Kettering Cancer Center, Computational Biology Center, 1275 York Avenue, New York, NY 10065                  |
| Dr. | John N.    | Weinstein    | The University of Texas MD Anderson Cancer Center, Department of Bioinformatics and Computational Biology, Houston TX 77030 |
| Dr. | Daniel J.  | Weisenberger | University of Southern California, USC/Norris Comprehensive Cancer Center, 1450 Biggy St., NRT G511, Los Angeles, CA 90033  |
| Dr. | Matthew D. | Wilkerson    | Department of Genetics, University of North Carolina at Chapel Hill, Chapel Hill, NC 27599 USA                              |
| Ms. | Lisa       | Wise         | The Research Institute at Nationwide Children's Hospital, Columbus, OH 43205                                                |
| Dr. | John       | Witte        | University of CA San Francisco                                                                                              |
| Dr. | Chia-Chin  | Wu           | Department of Genomic Medicine, The University of Texas MD Anderson Cancer Center. Houston, TX 77030 USA                    |
| Mr. | Junyuan    | Wu           | Lineberger Comprehensive Cancer Center, University of North Carolina at Chapel Hill, Chapel Hill, NC 27599 USA              |

|     |            |           |                                                                                                                                                 |
|-----|------------|-----------|-------------------------------------------------------------------------------------------------------------------------------------------------|
| Mr. | Ye         | Wu        | Leidos Biomedical, 9609 Medical Center Dr Rockville, MD 20850                                                                                   |
| Dr. | Andrew W.  | Xu        | Center for Biomedical Informatics, Harvard Medical School, Boston, MA 02115, USA                                                                |
| Dr. | Shalini S. | Yadav     | Weill Cornell Medical College, Department of Urology, New York, NY 10021                                                                        |
| Dr. | Lixing     | Yang      | Center for Biomedical Informatics, Harvard Medical School, Boston, MA 02115, USA                                                                |
| Dr. | Liming     | Yang      | National Cancer Institute, 31 Center Dr, 3A20, Bethesda, MD 20892                                                                               |
| Dr. | Christina  | Yau       | Buck Institute                                                                                                                                  |
| Dr. | Huihui     | Ye        | Beth Israel Deaconess Medical Center, 330 Brookline Ave, Boston MA 02215                                                                        |
| Ms. | Peggy      | Yena      | International Genomics Consortium, 445 N. 5th Street, Phoenix, AZ 85004                                                                         |
| Mr. | Thomas     | Zeng      | Canada's Michael Smith Genome Sciences Centre, BC Cancer Agency, Vancouver, BC V5Z 4S6, Canada                                                  |
| Dr. | Jean C.    | Zenklusen | National Cancer Institute, 31 Center Dr, 3A20, Bethesda, MD 20892                                                                               |
| Dr. | Jianhua    | Zhang     | Institute for Applied Cancer Science, Department of Genomic Medicine, The University of Texas MD Anderson Cancer Center, Houston, TX 77030, USA |
| Dr. | Wei        | Zhang     | Department of Pathology, University of Texas MD Anderson Cancer Center, Texas 77030                                                             |
| Ms. | Jiashan    | Zhang     | National Cancer Institute, 31 Center Dr, 3A20, Bethesda, MD 20892                                                                               |
| Mr. | Yi         | Zhong     | Memorial Sloan Kettering Cancer Center, Computational Biology Center, 1275 York Avenue, New York, NY 10065                                      |
| Ms. | Kelsey     | Zhu       | Canada's Michael Smith Genome Sciences Centre, BC Cancer Agency, Vancouver, BC V5Z 4S6, Canada                                                  |
| Dr. | Erik       | Zmuda     | The Research Institute at Nationwide Children's Hospital, Columbus, OH 43205                                                                    |
