# Supplementary material
Source: PubMed Central journal article supplement (PMC6372064)
Supplement: NIHMS81540-supplement-Supplementary_Table_4.pdf [file NIHMS81540-supplement-Supplementary_Table_4.pdf]

**SUPPLEMENTARY TABLE 4**

|                  | Cox model <i>p</i> -value | Cox model adjusted <i>p</i> -value (BH) | Hazard ratio | Cox multivariate model <i>p</i> -value | Cox multivariate model hazard ratio |
|------------------|---------------------------|-----------------------------------------|--------------|----------------------------------------|-------------------------------------|
| <i>CDH12</i>     | 0.000085                  | 0.006                                   | 9.3          | 0.00061                                | 7.3                                 |
| <i>ANTXR2</i>    | 0.00033                   | 0.012                                   | 7.7          | 0.0015                                 | 6.5                                 |
| <i>SPOP</i>      | 0.0042                    | 0.081                                   | 3.9          | 0.0016                                 | 4.8                                 |
| <i>IL6ST</i>     | 0.0046                    | 0.081                                   | 4.8          | 0.0014                                 | 6.2                                 |
| <i>ZFHX4</i>     | 0.015                     | 0.22                                    | 3.8          | 0.021                                  | 3.6                                 |
| <i>NCOA7</i>     | 0.019                     | 0.23                                    | 4.4          | 0.012                                  | 5                                   |
| <i>DLC1</i>      | 0.031                     | 0.26                                    | 3.8          | 0.11                                   | 2.8                                 |
| <i>PPAP2A</i>    | 0.032                     | 0.26                                    | 2.9          | 0.037                                  | 2.9                                 |
| <i>SENP6</i>     | 0.034                     | 0.26                                    | 3.7          | 0.1                                    | 2.8                                 |
| <i>MTUS1</i>     | 0.037                     | 0.26                                    | 3.7          | 0.078                                  | 3                                   |
| LOH, chr 13:46Mb | 0.04                      | 0.26                                    | 2.4          | 0.081                                  | 2.2                                 |
| <i>GRM1</i>      | 0.05                      | 0.29                                    | 4.4          | 0.077                                  | 3.8                                 |
| <i>PDE4D</i>     | 0.061                     | 0.33                                    | 2.8          | 0.028                                  | 3.4                                 |
| <i>CHD1</i>      | 0.069                     | 0.33                                    | 2.3          | 0.04                                   | 2.6                                 |
| Gain, chr 9:43Mb | 0.07                      | 0.33                                    | 2.2          | 0.08                                   | 2.1                                 |
| LOH, chr 1:235Mb | 0.095                     | 0.38                                    | 2.4          | 0.16                                   | 2.1                                 |
| <i>MTMR7</i>     | 0.096                     | 0.38                                    | 2.8          | 0.19                                   | 2.3                                 |
| <i>CDKN1B</i>    | 0.097                     | 0.38                                    | 2.1          | 0.087                                  | 2.3                                 |
| <i>MAP3K1</i>    | 0.14                      | 0.52                                    | 2.5          | 0.11                                   | 2.7                                 |
| <i>ROBO1</i>     | 0.15                      | 0.55                                    | 2.4          | 0.26                                   | 2                                   |
| <i>SLC4A4</i>    | 0.16                      | 0.56                                    | 2.4          | 0.32                                   | 1.9                                 |
| LOH, chr 6:88Mb  | 0.21                      | 0.68                                    | 1.7          | 0.063                                  | 2.4                                 |
| <i>ETV3</i>      | 0.28                      | 0.74                                    | 2            | 0.45                                   | 1.6                                 |
| LOH, chr 8:23Mb  | 0.29                      | 0.74                                    | 1.6          | 0.4                                    | 1.5                                 |
| LOH, chr 2:141Mb | 0.29                      | 0.74                                    | 1.8          | 0.39                                   | 1.7                                 |
| ETS_status       | 0.3                       | 0.74                                    | 0.64         | 0.24                                   | 0.6                                 |
| <i>AMBRA1</i>    | 0.3                       | 0.74                                    | 2.2          | 0.48                                   | 1.7                                 |
| <i>IFI16</i>     | 0.34                      | 0.74                                    | 2            | 0.55                                   | 1.6                                 |
| LOH, chr 12:12Mb | 0.34                      | 0.74                                    | 1.5          | 0.46                                   | 1.4                                 |
| <i>ACPP</i>      | 0.35                      | 0.74                                    | 2            | 0.32                                   | 2.1                                 |
| LOH, chr 5:100Mb | 0.35                      | 0.74                                    | 1.5          | 0.25                                   | 1.7                                 |
| LOH, chr 3:72Mb  | 0.36                      | 0.74                                    | 0.63         | 0.23                                   | 0.5                                 |
| <i>PPP2R2A</i>   | 0.38                      | 0.74                                    | 1.7          | 0.53                                   | 1.5                                 |
| <i>RBM7</i>      | 0.38                      | 0.74                                    | 1.9          | 0.63                                   | 1.4                                 |
| <i>RYBP</i>      | 0.38                      | 0.74                                    | 0.62         | 0.4                                    | 0.63                                |
| LOH, chr 16:79Mb | 0.41                      | 0.74                                    | 0.66         | 0.49                                   | 0.67                                |
| <i>NCOR2</i>     | 0.43                      | 0.74                                    | 1.8          | 0.29                                   | 2.2                                 |
| <i>USP28</i>     | 0.44                      | 0.74                                    | 1.8          | 0.72                                   | 1.3                                 |
| <i>PPP4R2</i>    | 0.45                      | 0.74                                    | 0.46         | 0.42                                   | 0.43                                |
| <i>FOXA1</i>     | 0.45                      | 0.74                                    | 1.5          | 0.16                                   | 2.1                                 |
| <i>TP53</i>      | 0.45                      | 0.74                                    | 1.4          | 0.19                                   | 1.9                                 |
| <i>ERG</i>       | 0.46                      | 0.74                                    | 0.75         | 0.28                                   | 0.64                                |
| <i>ADAM28</i>    | 0.47                      | 0.74                                    | 1.6          | 0.86                                   | 1.1                                 |
| <i>NKX3.1</i>    | 0.47                      | 0.74                                    | 1.6          | 0.86                                   | 1.1                                 |
| LOH, chr 1:77Mb  | 0.47                      | 0.74                                    | 1.5          | 0.56                                   | 1.4                                 |
| LOH, chr 10:92Mb | 0.48                      | 0.75                                    | 0.65         | 0.25                                   | 0.44                                |
| HD, chr 10:90Mb  | 0.52                      | 0.78                                    | 0.62         | 0.23                                   | 0.33                                |
| <i>NEAT1</i>     | 0.53                      | 0.78                                    | 1.6          | 0.61                                   | 1.5                                 |

|                   |      |      |         |      |         |
|-------------------|------|------|---------|------|---------|
| Gain, chr 3:130Mb | 0.55 | 0.8  | 1.4     | 0.6  | 1.4     |
| <i>FOXP1</i>      | 0.58 | 0.8  | 1.3     | 0.57 | 1.3     |
| <i>TGFBR2</i>     | 0.58 | 0.8  | 0.56    | 0.47 | 0.47    |
| <i>ZBTB16</i>     | 0.64 | 0.87 | 1.4     | 0.95 | 1       |
| LOH, chr 17:7Mb   | 0.66 | 0.88 | 1.2     | 0.44 | 1.5     |
| <i>ZNF292</i>     | 0.73 | 0.93 | 1.2     | 0.9  | 0.93    |
| <i>SHQ1</i>       | 0.73 | 0.93 | 0.83    | 0.69 | 0.8     |
| LOH, chr 18:73Mb  | 0.73 | 0.93 | 1.2     | 0.82 | 1.1     |
| <i>TCF12</i>      | 0.8  | 0.99 | 1.2     | 0.85 | 1.2     |
| <i>ROBO2</i>      | 0.82 | 0.99 | 1.2     | 0.92 | 0.94    |
| <i>ARHGAP15</i>   | 0.82 | 0.99 | 1.2     | 0.86 | 0.87    |
| Gain, chr 8:89Mb  | 0.87 | 1    | 0.93    | 0.92 | 1       |
| HD, chr 5:98Mb    | 0.89 | 1    | 1.1     | 0.83 | 1.2     |
| <i>APC</i>        | 0.92 | 1    | 1.1     | 0.75 | 1.3     |
| Gain, chr 7:53Mb  | 0.93 | 1    | 1       | 0.9  | 1.1     |
| <i>MYST3</i>      | 0.93 | 1    | 1.1     | 0.51 | 0.55    |
| <i>ASH1L</i>      | 0.94 | 1    | 0.93    | 0.77 | 0.74    |
| <i>PTEN</i>       | 0.96 | 1    | 1       | 0.44 | 0.67    |
| <i>TBX18</i>      | 0.96 | 1    | 0.96    | 0.79 | 0.81    |
| <i>WGD</i>        | 0.98 | 1    | 1       | 0.9  | 1.1     |
| <i>TBL1XR1</i>    | 0.99 | 1    | 0.99    | 0.89 | 0.86    |
| <i>UBTF</i>       | 1    | 1    | 1.3E-08 | 1    | 3.3E-09 |
| <i>GPATCH8</i>    | 1    | 1    | 1.3E-08 | 1    | 3.2E-09 |
